1 **Hemispheric asymmetry of entrained auditory steady state**

2 **responses arise from the structural connectome**

3

4 **Authors:** Neeraj Kumar, Amit Kumar Jaiswal, Dipanjan Roy, Arpan

5 Banerjee\*

6 Cognitive Brain Dynamics Lab, National Brain Research Centre, NH 8, Manesar,

7 Gurgaon, 122052, India.

8

9 **Email:** arpan@nbrc.ac.in

10

11

12

13

14

15

16

17

18

19 **Abstract:** Structure-function relationships are of fundamental importance to biological  
20 systems. In the human auditory system, it has been demonstrated that asymmetric neuroanatomic  
21 embedding of primary auditory cortices in the whole brain network is predictive of functional  
22 lateralisation. However, a mechanistic and causal basis of the functional asymmetry due to the  
23 underlying structural constraints is poorly understood. The present article takes the help of  
24 computational modelling to demonstrate how functional lateralization emerges from the  
25 symmetries in structural connectome. First, we demonstrate a well-known lateralisation effect  
26 observed during entrainment of external rhythmic auditory stimulus at the level of cortical  
27 sources from EEG data. Subsequently, we simulate the dynamics of whole brain cortical  
28 responses from large-scale neurodynamic model using realistic connection topologies.  
29 Considering the effects of time-delay stemming from physical fibre distances computed from  
30 diffusion imaging metrics, and neuronal scaling and coupling based on empirical data, we could  
31 elucidate the biophysically realistic parameter regimes where the structural connectome is  
32 predictive of functional lateralisation. Thus our study provides a roadmap in causally linking  
33 structural symmetries to higher order brain function.

34

## 35 **1. Introduction:**

36 Several studies suggest that both structural and functional networks are asymmetrically  
37 distributed in the brain (Semmes, 1968; R J Zatorre & Belin, 2001) where each hemisphere is  
38 optimised to perform specialised tasks (Toga & Thompson, 2003). A popular example of  
39 functional asymmetry is dichotomous lateralisation in the processing auditory objects. For  
40 instance, speech and language are predominantly processed in the left hemisphere while right  
41 hemisphere is specialised for processing of music or rhythmic stimuli (Ross, Herdman, &  
42 Pantev, 2005; R J Zatorre & Belin, 2001). Asymmetry in the brain is thought to reflect  
43 evolutionary, developmental, experiential and pathological factors. However, mechanisms,  
44 origin or reasons behind this functional asymmetry is not resolved yet.

45

46 From an anatomical perspective there are asymmetric structural efferent projections from the  
47 auditory cortex in each hemisphere (Andoh, Matsushita, & Zatorre, 2015). This may contribute  
48 to the emergence of hemispheric specialization during processing of distinct features of auditory  
49 stimuli (Cammoun et al., 2015; Robert J Zatorre & Gandour, 2008). More recently, applying  
50 network analysis tools on diffusion-weighted imaging data Mišić and colleagues showed that the  
51 both auditory cortices are asymmetrically integrated in the whole brain structural network and  
52 this may result in the lateralized auditory responses (Mišić et al., 2018). Consequently, if there is  
53 asymmetry in the afferent anatomical input to the auditory cortex; one can hypothesize that  
54 hemispheric dominance should also depend on the ear of stimulation. Thus, an identical stimulus  
55 may elicit asymmetrically lateralized responses for monaural left and right stimulations. Study of  
56 such asymmetric responses not only helps in deciphering functional organization of the auditory  
57 system but also has clinical applications for studying experience-related changes in the case of

58 unilateral hearing impairment (Hine & Debener, 2007) or age related hearing impairments  
59 (Henry, Herrmann, Kunke, & Obleser, 2017). However, a key question that is still poorly  
60 understood is whether there is any causal link between large-scale structure of the brain and  
61 functional hemispheric specialisation.

62

63

64 Among functional responses that are of cortical origin, auditory steady state rhythms (ASSR)  
65 elicited by a periodic tonal stimulation has been identified as a potential marker of auditory  
66 processing (Mendel, 1980; Lins & Picton, 1995; Picton, John, Dimitrijevic, & Purcell, 2003).  
67 There are strong evidences that neural generators for ASSRs predominantly lie in primary  
68 auditory cortex (Gutschalk et al., 1999; Ross et al., 2005)) and distributed auditory areas (  
69 Farahani, Goossens, Wouters, & van Wieringen, 2017; Coffey et al., 2016), with activity more  
70 pronounced in the right hemisphere. Nonetheless, the generators of ASSRs are embedded in a  
71 whole-brain network displaying wide range of complex brain dynamics. Till date the  
72 mechanisms of this dynamical entrainment is out of scope of any study.

73

74 Emerging evidence suggests that biophysical models of the whole-brain that embeds the realistic  
75 structural constraints can reveal the mechanisms underlying functional responses (Ghosh, Rho,  
76 McIntosh, Kötter, & Jirsa, 2008; Honey, Kötter, Breakspear, & Sporns, 2007, Suarez et al 2020).  
77 In the present study, we use a large-scale neurodynamic model to identify the generative  
78 mechanisms of functional asymmetry of ASSRs. In particular, we have asked whether  
79 constraints in whole-brain structural connectivity with auditory brain regions as seed, is the cause  
80 of the asymmetry in brain functional organization. To address this, we collected empirical EEG

81 data using a tonal (1kHz) auditory stimulus repeated at 40 Hz to generate ASSRs during  
82 binaural, monaural left and monaural right conditions. We characterized the asymmetric  
83 functional organization of cortical responses at the sensor and source level power at 40 Hz.  
84 Subsequently, using the Kuramoto phase oscillators placed at locations guided by diffusion  
85 tensor imaging data (Abeyesuriya et al 2018) and coupled via distance scaling from fibre densities  
86 we could generate simulated ASSRs that retains the empirical symmetry. The mechanisms of  
87 ASSRs generation was evaluated from comparisons between empirical and simulated data.

88

## 89      **2. Materials and Methods**

### 90      **2.1 Participants**

91      Twenty-one healthy, right-handed human volunteers (16 males, 5 females, age range 22-39 years  
92      old; mean  $\pm$  SD =  $28 \pm 2.10$ ) participated in this study<sup>1</sup>. All the volunteers reported no medical  
93      history of audiological, neurological or psychiatric disorders. All of them had normal or  
94      corrected to normal visual acuity. Informed consents were given by all the volunteers in a format  
95      approved by the Institutional Human Ethics Committee (IHEC) of National Brain Research  
96      Centre. All participants were fluent in at least two languages, Hindi and English, but some were  
97      familiar more languages of Indian origin. All volunteers were undergraduate degree holders.

98

### 99      **2.2 Experimental design**

100      Stimuli consisted of sinusoidal tones of 1 KHz frequency with 5% rise and fall, presented 40  
101      times per second (Linden, Picton, Hamel, & Campbell, 1987). Each trial comprised of 1s “On”  
102      block (auditory stimulation) period followed by 1s “Off” block (silent) period (Figure 1A). A  
103      total of 100 trials (“On” blocks) were presented for each kind of auditory stimulation, monaural  
104      and binaural. In total, four experimental conditions, each lasting 200 seconds were performed in  
105      the following order: 1) a baseline condition in which the volunteers were not given any tonal  
106      stimuli; 2) Binaural (in both ears); 3) Monaural left (only through left ear); 4) Monaural right  
107      (only through right ear) (Figure 1B). The time interval between each condition was set to 100 s  
108      (silent). Auditory stimuli were created and presented in Stim2 software (Compumedics, Inc.,

---

<sup>1</sup>      A subset of this data (10 volunteers) were used in a Methods paper Halder, T; Talwar, S., Jaiswal, A.K., Banerjee, A.(2019): Quantitative evaluation in estimating sources underlying brain oscillations using current source density methods and beamformer approaches. eNeuro. 2019 Jul-Aug; 6(4): ENEURO.0170-19.2019.

109 USA) at the intensity of 90 dB. Participants were instructed to stay still in sitting position, fixate  
110 on a visual cross displayed on a computer screen for the duration, and listen to the tones. When  
111 the volunteers were performing the experiment, continuous scalp EEG was recorded with  
112 relevant trigger data.

113

### 114 **2.3 Neuroimaging procedure**

115 EEG data were recorded using 64 high-density Ag/AgCl sintered electrodes mounted in an  
116 elastic head cap according to the international 10-20 system. All recordings were done in a noise  
117 proof isolated room using NeuroScan (SynAmps2) system (Compumedics Inc, USA) with 1  
118 KHz sampling rate. Abrasive electrolyte gel (EASYCAP) was used to make a contact between  
119 EEG sensors and scalp surface and impedance was maintained at values less than 5 k $\Omega$  in each  
120 sensor throughout the entire experiment. The EEG system-assigned reference electrode at the  
121 vertex was selected for reference and the forehead (AFz) electrode as the ground.

122

### 123 **2.4 Pre-processing of EEG signals**

124 EEG data were imported in MATLAB using EEGLAB from Neuroscan raw files. Epochs of  
125 1000 ms from “On” blocks were extracted from each trial. The resulting epochs were then  
126 bandpass filtered to retain frequencies in the range 2 to 48 Hz, followed by detrending (baseline  
127 correction) of data to remove any linear trends from the signal. Trials having a voltage greater  
128 than  $\pm 100$   $\mu\text{v}$  were considered as artifacts and therefore discarded. All trials from both monaural  
129 conditions of participant 15 were full of artefacts; therefore we had removed data of participant  
130 15 for further analysis. Furthermore, since the objective was to estimate the steady-state activity  
131 of the brain, we concatenated time series of ten consecutive epochs (while keeping their temporal

132 order intact) to enhance spectral resolution. Trials from all participants were grouped together,  
133 resulting in a time series of 10s for each condition.

134

## 135 **2.5 Spectral analysis**

136 Multi-tapered power spectral density was computed using Chronux function *mtspectrumc.m*  
137 (<http://chronux.org/>) and customized MATLAB ([www.mathworks.com](http://www.mathworks.com)) scripts at each sensor,  
138 trial and condition. Power spectra of the concatenated time series were calculated in the  
139 frequency range of 2 - 48 Hz having a frequency resolution of 0.06 Hz with time-bandwidth  
140 product and number of tapers set at 5 and 3, respectively, as the input parameters. Subsequently,  
141 differences in spectral power at 40 Hz (frequency of interest) between auditory stimulation tasks  
142 and baseline condition were statistically evaluated by means of a permutation test using  
143 *ft\_freqstatistics.m*, a function of fieldtrip toolbox ([www.fieldtriptoolbox.org](http://www.fieldtriptoolbox.org)). Paired-sample t-  
144 statistic between auditory stimulation and baseline condition was computed at each sensor.  
145 Additionally, to circumvent multiple comparison problem we clustered sensors based on their  
146 spatial adjacency (Maris, Schoffelen, & Fries, 2007). Therefore, neighboring electrodes having t-  
147 value higher than  $t_{185} = 3.63$  or lower than  $t_{185} = -4.01$ ;  $p < 0.05$  were counted as a cluster.  
148 Afterwards, cluster statistics were derived by taking the sum of t - statistics across a cluster  
149 which was compared with the null distribution of cluster statistics generated by random  
150 permutation procedure (1000 times). Subsequently, the statistical significance of the spectral  
151 difference between the two conditions was assessed by using a two-tailed t-test in which the  
152 observed test statistic value of the cluster was the threshold at 95<sup>th</sup> percentile of the null  
153 distribution. *p*-values of the clusters were obtained by estimating the proportion of clusters from  
154 the null distribution that are beyond the aforesaid threshold.



## 155 **2.6 Source reconstruction**

156 We performed exact low-resolution brain electromagnetic tomography (eLORETA) (Pascual-  
157 Marqui, 2007) to locate the stimulus-specific sources of 40 Hz ASSRs. First, as a head model,  
158 we used the standardized boundary element method (BEM) volume conduction model of the  
159 human head as a common template for all participants (Oostenveld, Stegeman, Praamstra, & van  
160 Oosterom, 2003). We discretized the brain volume into 2807 regularly spaced three-dimensional  
161 cubic. The centre of the cubic grid had the coordinates following the Montreal Neurological  
162 Institute (MNI) template. Furthermore, employing the sensors location information along with  
163 the head model we created a leadfield for each grid.

164 Subsequently, to obtain the oscillatory sources of 40 Hz activity we employ distributed source  
165 modelling using exact low-resolution brain electromagnetic tomography (eLORETA).  
166 eLORETA estimates the current source density across brain volume by minimizing the surface  
167 Laplacian component during the construction of the spatial filter (Pascual-Marqui, 2007,  
168 Pascual-Marqui, et al., 2011). Additionally, eLORETA does not rely upon any assumption  
169 regarding the number of underlying sources while having a very good control over suppression  
170 of false positives during detection of sources (Halder, Talwar, Jaiswal, & Banerjee, 2019). The  
171 source analysis was performed using Fieldtrip toolbox (Oostenveld, Fries, Maris, & Schoffelen,  
172 2011; <http://fieldtriptoolbox.org>). The ingredients to construct a frequency domain eLORETA  
173 filter are the forward model and the cross-spectral matrix of sensor data. Hence, we computed  
174 sensor-level cross-spectral matrix from ‘On’ blocks time series (i.e., 1 s) after re-referencing the  
175 EEG data on common average reference for all conditions. Thereafter, a common spatial filter  
176 was computed employing combined data from all conditions. A common filter attenuates filter  
177 specific variability during inverse modelling i.e., the observed difference between different

178 conditions is attributed only to the differences in conditions not due to differences in the spatial  
179 filter. Spatial filter for each grid was then calculated in 3 orthogonal directions. Since we do not  
180 have any prior assumption about the orientation of the underlying source, therefore, the cross-  
181 spectra of sensor data were projected through the strongest orientation of dipole i.e., denoting  
182 maximum variance. Consequently, a 3D distribution of source power across brain volume was  
183 obtained. Afterwards, prominent sources were selected after thresholding the source power  
184 distribution at 95th quantile. Supra-thresholded sources were visualized by rendering onto the  
185 Colin27 brain template.

186

## 187 **2.7 Neurodynamic model**

188 We obtained structural connectivity and fiber length matrices from an online dataset derived  
189 from diffusion MRI probabilistic tractography of 40 participants (Abey Suriya et al., 2018).  
190 Obtained structural connectivity matrix was parcellated in 68 regions according to the Desikan–  
191 Killiany brain atlas. Subsequently, we simulated a network of 68 coupled Kuramoto oscillators,  
192 each oscillator representative of a brain parcel. The oscillators were coupled according to  
193 empirically derived anatomical strengths and time delays. Each hemisphere constituted an equal  
194 set of 34 nodes. SC matrix and fiber length matrix both were symmetric matrices representing  
195 mean white matter densities and distance among nodes, respectively. Coupling strength matrix  
196 was normalized between 0 and 1 such that the maximum strength among connections was 1. The  
197 values at the diagonals of the connection strength and fiber length matrix representing self-  
198 connectivity and length with self, respectively, were set at zero (see Supplementary Material).

199

200 To imbibe the realism of primary generators of ASSRs lie in auditory cortex, we chose two  
201 nodes in the primary auditory cortex (PAC) (and other 66 nodes in rest of brain as non-auditory  
202 nodes (non-PAC). Using the Kuramoto model (Kuramoto et al., 1984) the phase dynamics of any  
203 non-PAC nodes is defined as

204

$$205 \quad \dot{\theta}_n = \omega_n + k \sum_{p=1}^N C_{np} \sin(\theta_p(t - \tau_{np}) - \theta_n(t)), \forall n = 1, 2 \dots N - 2 \quad (1)$$

206

207 where  $\omega_n$  represents the intrinsic frequency of the oscillator as  $\omega_n = 2\pi f_n$ ;  $k$  is mean coupling  
208 strength used to scale the all coupling strengths;  $\tau$  represents mean transmission delay employed  
209 to calculate time step delays among nodes given the length of the fiber. In equation (1) the value  
210 of  $p$  iterates from 1 to 68 including auditory nodes. This implies that phase dynamics of non-  
211 PAC will depend on phase dynamics of all other nodes including both auditory nodes. However,  
212 phase dynamics of the PAC nodes are defined as,

213

$$214 \quad \dot{\theta}_A = \omega_A \quad , \quad \text{where } \omega_A = 2\pi * f_A$$

215

216 After setting frequency of non-PAC nodes ( $f_n$ ) at 10 Hz and frequency of PAC ( $f_A$ ) nodes at 40  
217 Hz, we investigated hemispheric laterality indices across a model parameter space, wherein  $k$   
218 values range from 1 to 50 and  $\tau$  values from 4 to 12.  $\tau$  values in this range correspond to the  
219 bio-physiologically realistic communication speed of around 5-20 m/s in adult primate brain  
220 (Ghosh et al., 2008). For every  $\tau$  value employing fiber length matrix we estimated the time  
221 delays matrix that are involved in transmitting information between any pair of nodes (Cabral,  
222 Hugues, Sporns, & Deco, 2011). Similarly, structural connectivity was transformed into the  
223 coupling strength matrix  $C$ . These transformations imply that coupling strength and delay

224 between any pair of nodes will be proportional to the structural connectivity and fiber length  
225 matrix. Hence,  $C_{np}$  and  $\tau_{np}$  respectively represents the coupling strength and time delay between  
226 node  $n$  and  $p$ . Therefore, the dynamics of theta at any node will be a function of its anatomical  
227 strength and distance with other nodes. The model was simulated for about 25 seconds. We took  
228 sine of theta obtained at each node which represents a simulation of neural time series at EEG  
229 source level. Subsequently, we calculated the power spectral density from 68 nodes followed by  
230 hemispheric laterality analysis of the spectral power at 40 Hz (See more in section 2.8). During  
231 monaural condition simulations we asymmetrically scaled the relative coupling strengths of both  
232 PAC nodes with non-PAC nodes by the ratio of spectral power we obtained empirically between  
233 left and right hemisphere auditory parcels after source reconstruction. Remaining procedure  
234 remained same as described above for binaural condition simulation.

## 235 **2.8 Laterality analysis**

236 Hemispheric asymmetry in brain responses was quantified using laterality indices ( $LI$ ), which is  
237 the difference between right hemisphere (RH) and left hemispheric (LH) responses normalized  
238 by the sum of response in both hemispheres.

$$239 \quad LI = \frac{RH-LH}{RH+LH} \quad (6)$$

240 Value of  $LI$  lies between +1 and -1. Wherein +1 represent complete right hemispheric  
241 dominance, -1 for complete left hemispheric dominance and 0 for bilaterally symmetric  
242 response.  $LIs$  for spectral power were computed at source level for empirical and theoretical  
243 dataset.

244

## 245 **3. Results**

### 246 **3.1 Spectral topography of ASSRs**

247 Grand mean power spectra (and subject-wise power spectra [see Figure S1]) averaged over all  
248 electrodes and volunteers showed enhancement of spectral power specifically at 40 Hz (Figure  
249 2A) in both monaural and binaural conditions relative to the silent baseline. Differences between  
250 the topographic scalp distribution at 40 Hz during auditory stimulations and the baseline were  
251 evaluated using cluster-based permutation tests (See Methods). Significant enhancement of  
252 spectral power at 40 Hz in distributed scalp sensor locations was observed (Figure 2B). The  
253 purple “\*” on the topoplots in Figure 2B maps the position of electrodes that are significantly  
254 different from the baseline condition at 95% confidence level. Overall, the pattern of distribution  
255 of enhancement in the spectral power at 40 Hz was found to be similar in both binaural and  
256 monaural conditions. However, differences in magnitudes were observed across different  
257 conditions and both hemispheres. In summary, we have observed two significant clusters of  
258 spectral power during every stimulation condition. Wherein one large cluster was located over  
259 the fronto-central area and another in bi-lateral caudal parts of the scalp (Figure 2 B and Table  
260 1). However, the channels in the right posterior region showed greater enhancement compared to  
261 their counterpart in left hemisphere during binaural and monaural right condition. As a sanity  
262 check, we further validated the presence of right hemispheric dominance during binaural  
263 condition in different temporal segments (early, middle and late ERP components) of “On”  
264 block.

265

266

267

## 268 **3.2 Source-level functional organisation of 40 Hz ASSRs**

269 We used exact low-resolution brain electromagnetic tomography (eLORETA) to calculate the  
270 three-dimensional spatial distribution of source activity and identified the prominent sources of  
271 40 Hz ASSRs. Reconstructed sources were rendered onto a standard cortical surface derived  
272 from colin27 brain provided in fieldtrip toolbox (<http://fieldtriptoolbox.org>). The locations of  
273 prominent sources during monaural left, monaural right and binaural condition are shown in  
274 Figure 3. Anatomical labels (According to Desikan-Killiany atlas) corresponding to source  
275 regions and number of activated voxels in the respective region are summarised in Table 2. We  
276 found distributed sources of 40 Hz ASSRs in auditory cortices and beyond auditory cortices. We  
277 found main activations in the temporal lobe (bilateral STG, MTG and ITG), supramarginal,  
278 inferior frontal gyrus, bilateral pre-central gyrus, bilateral post-central gyrus, and occipital lobe.  
279 Majority of the sources exhibited right hemisphere dominance irrespective of the stimulation  
280 condition. Activation in right transverse temporal is unique during monaural left condition. Left  
281 MTG showed significant activation only during monaural left and binaural condition but not  
282 during the monaural right condition. Laterality indices (LI) computed from source power  
283 revealed right hemispheric dominance during the every type of stimulation condition.  
284 Particularly, during binaural condition (mean LI = 0.09), monaural left condition (mean LI =  
285 0.10 and during monaural right condition (mean LI = 0.20).

286

## 287 **3.3 Neural Dynamical Model**

288 We modelled each parcellated brain area (using Desikan Killiany atlas), as Kuramoto phase  
289 oscillator, coupled by coupling coefficients and time delay that were derived from empirical  
290 diffusion tensor imaging data (see Methods for details, Figure 4A). The nodes in auditory cortex

291 were driven by 40 Hz external inputs while keeping the intrinsic frequency of other nodes at 10  
292 Hz. The system of differential equations were numerically integrated using Euler integration  
293 method for 250000 time points with a step size (dt) of 0.0001. The initial 10000 time points were  
294 removed before power spectral density was computed from remaining 15000 time points  
295 representing source time series of 15 seconds duration, at a sampling rate of 1000 Hz. Thereafter,  
296 we calculated the hemispheric laterality indices (LI) from spectral power distribution at 40 Hz.  
297 Figure 4C demonstrates the LI values across a range of  $k$  (1 to 50) and  $\tau$  (4 to 12) values. Positive  
298 LI values were obtained across all over parameter space spanned by  $k$  and  $\tau$ . In particular the LI  
299 value ranged (0.02, 0.07] for monaural left condition, (0.03, 0.08] for monaural right condition  
300 and (0.01, 0.058] for binaural condition. However, we also found that LI varies as a function of  
301 both time delay and mean coupling strength. Specifically, for every type of simulation condition  
302 LI increased positively (Right hemispheric dominance) when coupling ( $k$ ) and speed of  
303 transmission ( $\tau$ ) increases. The topology of LI across ( $k, \tau$ ) space during all conditions were  
304 similar. Finally, we compared the LI obtained from the model with the empirical LI in Figure  
305 4B. For that purpose, we selected the values of  $k$  ( $k = 230$ ) and  $\tau$  ( $\tau = 4$ ) that yielded the  
306 maximum match with empirical LI values after simulation of model with parameter  $k$  ranging  
307 from 1 to 300, while keeping tau fixed at 4. The resulting mean LI values for each condition are  
308 bin: 0.07, monaural left: 0.09, monaural right: 0.11.  
309

## 310 **4. Discussion**

311 ASSRs involve synchronization of distributed neuronal assemblies to a periodic external input  
312 (Pastor et al., 2002; Reyes et al., 2005). Heschl's gyri situated in primary auditory cortices are  
313 known to be the first cortical structure to receive auditory information. Subsequently,  
314 information from primary auditory cortices is segregated to the specialised higher order cortical  
315 structures to resolve and process features of auditory stimuli. Misic and colleagues suggested that  
316 there is asymmetry in communication pathways among both primary auditory cortices to other  
317 brain regions may contribute to functional lateralisation in auditory system (Mišić et al., 2018).  
318 In the present study we demonstrated the role of whole-brain structural connectome in which the  
319 auditory brain regions are embedded in guiding the hemispheric functional asymmetry of ASSR.  
320 First, we replicated the earlier findings of entrained 40 Hz oscillations representing amplitude  
321 modulation of the auditory stimuli corroborating previous studies (Galambos, Makeig, &  
322 Talmachoff, 1981; Hari et al., 1989; Linden et al., 1987). The enhanced auditory steady state  
323 response (ASSRs) was dominant over the right hemisphere which replicates earlier studies (Ross  
324 et al., 2005). Second, we localise sources of sensor level 40 Hz activity wherein temporal gyri  
325 being a major player of asymmetry during 40 Hz ASSRs. Third, by simulating auditory nodes as  
326 externally driven oscillators in a whole-brain network of Kuramoto oscillators we could  
327 accurately predict the functional lateralization of ASSR. Importantly, regardless of the fact that  
328 the SC matrices were not of the participants from whom the EEG data was collected the  
329 combination of computational model and structural connectivity still could explain the functional  
330 asymmetry, in a wide range of biologically realistic time-delays and coupling.

331



### 332 **Sources beyond the auditory cortex**

333 We used eLORETA to locate sources of 40 Hz ASSRs during binaural and both monaural  
334 conditions, as it has been proved, specifically for 40 Hz ASSRs in a subset of dataset used here,  
335 to show significant control over the false positive ratio in the distributed dipole condition (Halder  
336 et al., 2019). In addition to classic auditory pathway, we also report strongest activation beyond  
337 primary auditory cortex as well. For instance, brain regions in inferior parietal gyrus, pre-central  
338 and post-central gyrus, inferior and middle frontal gyrus and occipital cortex (Table 2), which is  
339 in line with earlier findings on reconstructed 40 Hz ASSRs sources with equivalent dipole  
340 modelling. Farahani and colleagues identified distributed sources in both cortical and subcortical  
341 regions during 4, 20, 40, and 80 Hz ASSRs (Farahani, Goossens, Wouters, & van Wieringen,  
342 2017). Our study reveals that right hemispheric dominance during binaural condition is not  
343 solely limited to core auditory areas but regions beyond primary auditory areas also contribute to  
344 right hemispheric lateralization (Table 2, Figure 3). During every type of stimulation condition,  
345 we found prominent sources among bilateral supra-temporal gyri, pre-central and post-central  
346 gyri. Activation in superior temporal gyrus (STG) is corroborated with earlier findings (Mäkelä  
347 & Hari, 1987). Core areas of auditory cortex are highly responsive to pure tones (tonotopic  
348 organization), surrounded by belt regions that are responsive to more complex tones  
349 (cochleotopic organization) (Banerjee, Kikuchi, Mishkin, Rauschecker, & Horwitz, 2018). We  
350 have found several 40 Hz oscillatory sources in spatially distinct brain regions, which are in  
351 general involved in different stages in the hierarchy of information processing during binaural  
352 and both monaural conditions. In a PET-weighted LORETA neuroimaging study Reyes and  
353 colleagues reported prominent activation in right temporal lobe and right parietal lobe along with  
354 activations in right frontal lobe during monaural right condition (Reyes et al., 2005). Several

355 studies have also reported anatomical projections from STG to frontal cortex (Hackett, 2011;  
356 Kaas & Hackett, 2000; Plakke & Romanski, 2014). Wang and colleagues identified functional  
357 network comprising of frontal cortex and superior temporal regions that are sensitive to tone  
358 repetition pattern, which is associated with human's unique ability for language processing  
359 (Wang, Uhrig, Jarraya, & Dehaene, 2015). Hence, our results supports the view that auditory  
360 processing at a very basic level requires other brain areas beyond primary auditory cortices.

361

### 362 **Asymmetric lateralization of brain rhythms**

363 A key finding of our study is the right hemispheric dominance revealed by the laterality analysis  
364 during the most environmentally realistic hearing condition of binaural stimulation. This is in  
365 line with the previous finding that suggested tonal or melodic stimuli are predominantly  
366 processed in the right hemisphere while speech and language stimuli showed left hemisphere  
367 dominance (Albouy et al., 2020; Ross et al., 2005; R J Zatorre & Belin, 2001). Ross and  
368 colleagues further proposed that right hemisphere dominance during ASSRs may be the result of  
369 processing temporal regularities associated with pitch processing of incoming sound (Ross et al.,  
370 2005). More recently, applying network analysis tools on diffusion tensor imaging data Misić  
371 and colleagues showed that the right auditory cortex is better integrated with other parts of the  
372 brain and this may result in the right hemispheric primacy to complex cognitive processing such  
373 as music (Mišić et al., 2018). Thus, the explanation of observed functional right hemispheric  
374 dominance may partly lie in the anatomical asymmetries of the structural connectome that  
375 embeds auditory cortical areas. A more explicit demonstration of this hypothesis came from our  
376 computational study. For the purpose of the current manuscript we undertook source-level  
377 analysis using eLORETA to get an distribution of 40 Hz ASSRs to understand if there are

378 particular brain regions that may have a contribution on functional asymmetry. Almost all the top  
379 sources showed right hemispheric dominance irrespective of the stimulation condition. The  
380 number of sources and their power in the right hemisphere was more than that of the left  
381 hemisphere during binaural stimulation, thus, following the same reverberating theme of right  
382 hemispheric dominance.

383

384 Another key finding of our study is that at source level right hemisphere was largely dominant  
385 during every stimulation condition. However, if we compare activations in hemisphere among  
386 conditions rather than their equivalent area in other hemisphere we found among monaural  
387 conditions left hemisphere was more dominant during monaural condition. Specifically, left  
388 middle temporal gyri are activated in monaural left condition but not during monaural right  
389 condition. Additionally, number of voxels in left lateral occipital lobe, STG, post-central gyrus,  
390 and fusiform were greater during monaural left condition than monaural right condition. This  
391 implies greater activation during ipsilateral ear stimulation compared to the contralateral ear  
392 stimulation. In an EEG study Reyes and colleagues (Reyes et al., 2005) reported ipsilateral  
393 dominance in temporal lobe /inferior parietal lobe (IPL) during 40 Hz -ASSRs. The dominance  
394 of ipsilateral (right) PoG and IPL during monaural right condition was also reported by Pastor  
395 and Reyes, respectively during 40 Hz ASSRs (Pastor et al., 2002; Reyes et al., 2005).

396

397 Characterizing hemispheric dominance in the functional specialization of sensory processing is a  
398 fundamental question in cognitive neuroscience. There are many factors that are posed as to  
399 influence lateralisation in brain including anatomical asymmetries, stimulus designs, sex and  
400 handedness of the participant (Hutsler & Galuske, 2003; Melynyte et al., 2017; Tervaniemi et al.,

401 2000). The main contribution of our study is the demonstration of how functional lateralization  
402 of ASSR, is an outcome of the dynamical evolution of spatiotemporal brain patterns via neural  
403 interactions scaffolded by the structural connectome. Structural connection is been known to  
404 play a role in determining functional connectivity (Honey et al., 2007). We propose that the  
405 structural connectome gives rise to two important physiological constraints, time-delays of  
406 propagation of information among brain areas, and possible neural covariates dependent on  
407 tissue properties such as white matter density, myelination that are also subject to  
408 neuroplasticity. This provides further opportunity to expand the model to tests different groups of  
409 volunteers, such as musicians whose auditory systems may have higher fidelity and across life  
410 span ageing where the tissue parameters of brain has changed. The validation of our model in  
411 such data sets will be certainly one of our main targets in future.

412

413 While our study lays out the 40 Hz ASSRs at the scalp and source level, however, there are  
414 certain limitations to the result that can be improved in the future. One immediate factor that can  
415 shape up the right-hemisphere dominance is the role of language. Although we did not test the  
416 participants on their linguistic or auditory processing skills, all our participants were self-  
417 declared bi-literates and in some cases knew more than two Indian languages. Second, we did  
418 not choose participants based on their musical training which can be a potential future direction  
419 to look for pattern differences. Third, an interesting extension for the asymmetrical differences  
420 we report can be explored in data sets present in the literature from neurodevelopmental  
421 disorders such as autism and neuropsychiatric disorders like schizophrenia. An important  
422 direction of ASSRs research is to define normative patterns of cortical auditory processing  
423 beyond the simple audiological tests. This is where we propose our results would be most

424 valuable and more focussed research delineating our patterns from neural disorders is needed in  
425 the future. If we can use some language like stimuli and see the emergence of asymmetry then  
426 we can prove that which features of speech or language (intelligibility or spectral / temporal  
427 cues) given the right hemispheric structural dominance dictate the asymmetry in the auditory  
428 system.

429

### 430 **Conflict of Interest Statement**

431 The authors declare no conflicts of interest.

432

### 433 **Acknowledgments**

434 The study was supported by NBRC Core funds and by grants Ramalingaswami fellowship,  
435 (BT/RLF/Re-entry/31/2011) and Innovative Young Bio-technologist Award (IYBA),  
436 (BT/07/IYBA/2013) from the Department of Biotechnology (DBT), Ministry of Science and  
437 Technology, Government of India to AB. DR was supported by the Ramalingaswami fellowship  
438 (BT/RLF/Re-entry/07/2014) from DBT and extramural grant SR/CSRI/21/2016/ from  
439 Department of Science and Technology (DST), Ministry of Science and Technology,  
440 Government of India. AB and DR are jointly supported by BT/MED-  
441 III/NBRC/Flagship/Program/2019 from DBT. We sincerely thank late Dr. Jeffrey Michael Valla  
442 for constructive comments on an earlier version of this manuscript and Dr. Subham Kumar for  
443 helpful discussions and suggestions.

444

## 445 **References**

- 446 Abeysuriya, R. G., Hadida, J., Sotiropoulos, S. N., Jbabdi, S., Becker, R., Hunt, B. A. E.,  
447 Woolrich, M. W. (2018). A biophysical model of dynamic balancing of excitation and  
448 inhibition in fast oscillatory large-scale networks. *PLoS Computational Biology*, *14*(2).  
449 <https://doi.org/10.1371/journal.pcbi.1006007>
- 450 Albouy, P., Benjamin, L., Morillon, B., & Zatorre, R. J. (2020). Distinct sensitivity to  
451 spectrotemporal modulation supports brain asymmetry for speech and melody. *Science*,  
452 *367*(6481), 1043–1047. <https://doi.org/10.1126/science.aaz3468>
- 453 Andoh, J., Matsushita, R., & Zatorre, R. J. (2015). Asymmetric Interhemispheric Transfer in the  
454 Auditory Network: Evidence from TMS, Resting-State fMRI, and Diffusion Imaging.  
455 *Journal of Neuroscience*, *35*(43), 14602–14611. [https://doi.org/10.1523/JNEUROSCI.2333-](https://doi.org/10.1523/JNEUROSCI.2333-15.2015)  
456 [15.2015](https://doi.org/10.1523/JNEUROSCI.2333-15.2015)
- 457 Banerjee, A., Kikuchi, Y., Mishkin, M., Rauschecker, J. P., & Horwitz, B. (2018). Chronometry  
458 on Spike-LFP Responses Reveals the Functional Neural Circuitry of Early Auditory Cortex  
459 Underlying Sound Processing and Discrimination. *Eneuro*, *5*(3), ENEURO.0420-17.2018.  
460 <https://doi.org/10.1523/ENEURO.0420-17.2018>
- 461 Cabral, J., Hugues, E., Sporns, O., & Deco, G. (2011). Role of local network oscillations in  
462 resting-state functional connectivity. *NeuroImage*, *57*(1), 130–139.  
463 <https://doi.org/10.1016/j.neuroimage.2011.04.010>
- 464 Cammoun, L., Thiran, J. P., Griffa, A., Meuli, R., Hagmann, P., & Clarke, S. (2015).  
465 Intrahemispheric cortico-cortical connections of the human auditory cortex. *Brain Structure*  
466 *and Function*, *220*(6), 3537–3553. <https://doi.org/10.1007/s00429-014-0872-z>
- 467 Coffey, E. B. J., Herholz, S. C., Chepesiuk, A. M. P., Baillet, S., & Zatorre, R. J. (2016). Cortical

468 contributions to the auditory frequency-following response revealed by MEG. *Nature*  
469 *Communications*, 7. <https://doi.org/10.1038/ncomms11070>

470 Farahani, E. D., Goossens, T., Wouters, J., & van Wieringen, A. (2017). Spatiotemporal  
471 reconstruction of auditory steady-state responses to acoustic amplitude modulations:  
472 Potential sources beyond the auditory pathway. *NeuroImage*, 148, 240–253.  
473 <https://doi.org/10.1016/j.neuroimage.2017.01.032>

474 Galambos, R., Makeig, S., & Talmachoff, P. (1981). A 40-Hz auditory potential recorded from  
475 the human scalp. *Proceedings of the National Academy of Sciences of the United States of*  
476 *America*, 78(4), 2643–2647. <https://doi.org/10.1073/pnas.78.4.2643>

477 Ghosh, A., Rho, Y., McIntosh, A. R., Kötter, R., & Jirsa, V. K. (2008). Noise during Rest  
478 Enables the Exploration of the Brain’s Dynamic Repertoire. *PLoS Computational Biology*,  
479 4(10), e1000196. <https://doi.org/10.1371/journal.pcbi.1000196>

480 Gutschalk, A., Mase, R., Roth, R., Ille, N., Rupp, A., Hähnel, S., Scherg, M. (1999).  
481 Deconvolution of 40 Hz steady-state fields reveals two overlapping source activities of the  
482 human auditory cortex. *Clinical Neurophysiology*, 110(5), 856–868.  
483 [https://doi.org/10.1016/S1388-2457\(99\)00019-X](https://doi.org/10.1016/S1388-2457(99)00019-X)

484 Hackett, T. A. (2011). Information flow in the auditory cortical network. *Hearing Research*,  
485 271(1–2), 133–146. <https://doi.org/10.1016/j.heares.2010.01.011>

486 Halder, T., Talwar, S., Jaiswal, A. K., & Banerjee, A. (2019). Quantitative evaluation in  
487 estimating sources underlying brain oscillations using current source density methods and  
488 beamformer approaches. *ENeuro*, 6(4). <https://doi.org/10.1523/ENEURO.0170-19.2019>

489 Hari, R., Hämäläinen, M. S., & Joutsiniemi, S. L. (1989). Neuromagnetic steady-state responses  
490 to auditory stimuli. *J Acoust Soc Am*, 86(3), 1033–1039. <https://doi.org/10.1121/1.398093>

- 491 Henry, M. J., Herrmann, B., Kunke, D., & Obleser, J. (2017). Aging affects the balance of neural  
492 entrainment and top-down neural modulation in the listening brain. *Nature*  
493 *Communications*, 8(1), 15801. <https://doi.org/10.1038/ncomms15801>
- 494 Hine, J., & Debener, S. (2007). Late auditory evoked potentials asymmetry revisited. *Clinical*  
495 *Neurophysiology*, 118(6), 1274–1285. <https://doi.org/10.1016/j.clinph.2007.03.012>
- 496 Honey, C. J., Kötter, R., Breakspear, M., & Sporns, O. (2007). Network structure of cerebral  
497 cortex shapes functional connectivity on multiple time scales. *Proceedings of the National*  
498 *Academy of Sciences of the United States of America*, 104(24), 10240–10245.  
499 <https://doi.org/10.1073/pnas.0701519104>
- 500 Hutsler, J., & Galuske, R. A. W. (2003). Hemispheric asymmetries in cerebral cortical networks.  
501 *Trends in Neurosciences*. Trends Neurosci. [https://doi.org/10.1016/S0166-2236\(03\)00198-](https://doi.org/10.1016/S0166-2236(03)00198-)  
502 X
- 503 Kaas, J. H., & Hackett, T. A. (2000). Subdivisions of auditory cortex and processing streams in  
504 primates. *Proceedings of the National Academy of Sciences*, 97(22), 11793–11799.  
505 <https://doi.org/10.1073/pnas.97.22.11793>
- 506 Kuramoto, Y. (1984). *Chemical Oscillations, Waves, and Turbulence* (Vol. 19). Berlin,  
507 Heidelberg: Springer Berlin Heidelberg. <https://doi.org/10.1007/978-3-642-69689-3>
- 508 Linden, R. D., Picton, T. W., Hamel, G., & Campbell, K. B. (1987). Human auditory steady-state  
509 evoked potentials during selective attention. *Electroencephalography and Clinical*  
510 *Neurophysiology*, 66(2), 145–159. [https://doi.org/10.1016/0013-4694\(87\)90184-2](https://doi.org/10.1016/0013-4694(87)90184-2)
- 511 Lins, O. G., & Picton, T. W. (1995). Auditory steady-state responses to multiple simultaneous  
512 stimuli. *Electroencephalography and Clinical Neurophysiology/ Evoked Potentials*, 96(5),  
513 420–432. [https://doi.org/10.1016/0168-5597\(95\)00048-W](https://doi.org/10.1016/0168-5597(95)00048-W)



- 514 Mäkelä, J. P., & Hari, R. (1987). Evidence for cortical origin of the 40-Hz auditory evoked  
515 response in man. *Electroencephalography and Clinical Neurophysiology*, *66*, 539–546.
- 516 Maris, E., Schoffelen, J. M., & Fries, P. (2007). Nonparametric statistical testing of coherence  
517 differences. *Journal of Neuroscience Methods*, *163*(1), 161–175.  
518 <https://doi.org/10.1016/j.jneumeth.2007.02.011>
- 519 Melynyte, S., Pipinis, E., Genyte, V., Voicikas, A., Rihs, T., & Griskova-Bulanova, I. (2017). 40  
520 Hz Auditory Steady-State Response: The Impact of Handedness and Gender. *Brain*  
521 *Topography*, *31*(3), 419–429. <https://doi.org/10.1007/s10548-017-0611-x>
- 522 Mendel, M. I. (1980). Clinical use of primary cortical responses. *Audiology*, *19*(1), 1–15.  
523 Retrieved from <http://www.ncbi.nlm.nih.gov/pubmed/6986148>
- 524 Mišić, B., Betzel, R. F., Griffa, A., Reus, M. A. De, He, Y., Zuo, X., Zatorre, R. J. (2018).  
525 Network-based asymmetry of the human auditory system. *Cerebral Cortex*, (May), 1–14.  
526 <https://doi.org/10.1093/cercor/bhy101>
- 527 Oostenveld, R., Fries, P., Maris, E., & Schoffelen, J.-M. (2011). FieldTrip: Open source software  
528 for advanced analysis of MEG, EEG, and invasive electrophysiological data. *Computational*  
529 *Intelligence and Neuroscience*, *2011*, 156869. <https://doi.org/10.1155/2011/156869>
- 530 Oostenveld, R., Stegeman, D. F., Praamstra, P., & van Oosterom, A. (2003). Brain symmetry and  
531 topographic analysis of lateralized event-related potentials. *Clinical Neurophysiology :*  
532 *Official Journal of the International Federation of Clinical Neurophysiology*, *114*(7), 1194–  
533 1202. Retrieved from <http://www.ncbi.nlm.nih.gov/pubmed/12842715>
- 534 Pantev, C., Roberts, L. E., Elbert, T., Ross, B., & Wienbruch, C. (1996). Tonotopic organization  
535 of the sources of human auditory steady-state responses. *Hear Res*, *101*(1–2), 62–74.  
536 [https://doi.org/10.1016/S0378-5955\(96\)00133-5](https://doi.org/10.1016/S0378-5955(96)00133-5)

- 537 Pascual-Marqui, R. D. (2007). Discrete, 3D distributed, linear imaging methods of electric  
538 neuronal activity. Part 1: exact, zero error localization. Retrieved from  
539 <http://arxiv.org/abs/0710.3341>.
- 540 Pascual-Marqui, R. D., Lehmann, D., Koukkou, M., Kochi, K., Anderer, P., Saletu, B., Tanaka,  
541 H., Hirata, K., John, E. R., Prichep, L., Biscay-Lirio, R. and Kinoshita, T. (2011) Assessing  
542 interactions in the brain with exact low-resolution electromagnetic tomography. *Philos*  
543 *Trans A Math Phys Eng Sci*, 369(1952), pp. 3768-84.
- 544 Pastor, M. A., Artieda, J., Arbizu, J., Marti-Climent, J. M., Peñuelas, I., & Masdeu, J. C. (2002).  
545 Activation of human cerebral and cerebellar cortex by auditory stimulation at 40 Hz. *The*  
546 *Journal of Neuroscience: The Official Journal of the Society for Neuroscience*, 22(23),  
547 10501–10506. Retrieved from <http://www.ncbi.nlm.nih.gov/pubmed/12451150>
- 548 Picton, T. W., John, M. S., Dimitrijevic, A., & Purcell, D. (2003). Human auditory steady-state  
549 responses. *International Journal of Audiology*, 42(4), 177–219.  
550 <https://doi.org/10.1182/blood-2016-09-739086>
- 551 Plakke, B., & Romanski, L. M. (2014). Auditory connections and functions of prefrontal cortex.  
552 *Frontiers in Neuroscience*, (8 JUL). <https://doi.org/10.3389/fnins.2014.00199>
- 553 Plourde, G., Stapells, D. R., & Picton, T. W. (1991). The human auditory steady-state evoked  
554 potentials. *Acta Oto-Laryngologica*, 111(S491), 153–160.  
555 <https://doi.org/10.3109/00016489109136793>
- 556 Reyes, S. A., Lockwood, A. H., Salvi, R. J., Coad, M. Lou, Wack, D. S., & Burkard, R. F.  
557 (2005). Mapping the 40-Hz auditory steady-state response using current density  
558 reconstructions. *Hearing Research*, 204(1–2), 1–15.  
559 <https://doi.org/10.1016/j.heares.2004.11.016>

- 560 Ross, B., Herdman, A. T., & Pantev, C. (2005). Right hemispheric laterality of human 40 Hz  
561 auditory steady-state responses. *Cerebral Cortex*, *15*(12), 2029–2039.  
562 <https://doi.org/10.1093/cercor/bhi078>
- 563 Scherg, M., & Von Cramon, D. (1986). Evoked dipole source potentials of the human auditory  
564 cortex. *Electroencephalography and Clinical Neurophysiology*, *65*(5), 344–360.  
565 [https://doi.org/10.1016/0168-5597\(86\)90014-6](https://doi.org/10.1016/0168-5597(86)90014-6)
- 566 Semmes, J. (1968). Hemispheric specialization: A possible clue to mechanism.  
567 *Neuropsychologia* (Vol. 6). Pergamon Press. [https://doi.org/10.1016/0028-3932\(68\)90035-3](https://doi.org/10.1016/0028-3932(68)90035-3)
- 568 Stapells, D. R. (2010). Frequency-specific ABR and ASSRs threshold assessment in young  
569 infants. *A sound foundation through early amplification: An international conference* (pp.  
570 409–448). <https://doi.org/D21-P-1-10>
- 571 Tervaniemi, M., Medvedev, S. V., Alho, K., Pakhomov, S. V., Roudas, M. S., Van Zuijen, T. L.,  
572 & Näätänen, R. (2000). Lateralized automatic auditory processing of phonetic versus  
573 musical information: A PET study. *Human Brain Mapping*, *10*(2), 74–79.  
574 [https://doi.org/10.1002/\(SICI\)1097-0193\(200006\)10:2<74::AID-HBM30>3.0.CO;2-2](https://doi.org/10.1002/(SICI)1097-0193(200006)10:2<74::AID-HBM30>3.0.CO;2-2)
- 575 Tiihonen, J., Hari, R., Kaukoranta, E., & Kajola, M. (1989). Interaural interaction in the human  
576 auditory cortex. *Audiology Official Organ of the International Society of Audiology*, *28*(1),  
577 37–48.
- 578 Toga, A. W., & Thompson, P. M. (2003). Mapping brain asymmetry. *Nat Rev Neurosci*, *4*(1),  
579 37–48. <https://doi.org/10.1038/nrn1009>
- 580 Wang, L., Uhrig, L., Jarraya, B., & Dehaene, S. (2015). Representation of Numerical and  
581 Sequential Patterns in Macaque and Human Brains. *Current Biology*, *25*(15), 1966–1974.  
582 <https://doi.org/10.1016/j.cub.2015.06.035>

583 Zatorre, R J, & Belin, P. (2001). Spectral and temporal processing in human auditory cortex.

584 Cerebral Cortex (New York, N.Y.: 1991), 11(10), 946–953.

585 <https://doi.org/10.1093/cercor/11.10.946>

586 Zatorre, Robert J, & Gandour, J. T. (2008). Neural specializations for speech and pitch: Moving

587 beyond the dichotomies. *Philosophical Transactions of the Royal Society B: Biological*

588 *Sciences*. <https://doi.org/10.1098/rstb.2007.2161>

589

590

591 **Figure and table legends**

592 **Figure 1: Stimuli:** (A) Amplitude-modulated pure tone (1000 Hz frequency), of 25ms duration  
593 with 5ms rise/fall time, presented 40 times in a second during 1s ON block interspersed by two  
594 OFF blocks (silent periods). (B) **Auditory stimulation conditions:** monaural left, monaural right  
595 and binaural.

596

597 **Figure 2:** (A) Group-level power spectrum averaged over all sensors, measured for monaural left  
598 (magenta), monaural right (green), binaural stimuli (blue), and baseline (black) conditions. (B)  
599 Spectral difference: Topographical distribution of induced 40 Hz spectral power during  
600 presentation of periodic auditory stimuli at 40 Hz for 1.) monaural left (left panel), 2.) monaural  
601 right (middle panel) and 3.) binaural condition (right panel). '\*' mark the position of significant  
602 channels.

603

604 **Figure 3:** Sources of 40 Hz ASSRs for 1.) monaural left (1<sup>st</sup> row), 2.) monaural right (2<sup>nd</sup> row)  
605 and 3.) binaural conditions (3<sup>rd</sup> row) represented from axial (1<sup>st</sup> column), left (2<sup>nd</sup> column) and  
606 right(3<sup>rd</sup> column) view.

607

608 **Figure 4:** Large-scale neural model to mechanistically explain ASSR lateralization A.) Pipeline  
609 to calculate LI from empirical and simulated data. B.) Bar plots of group-level mean  
610 hemispheric laterality indices (LI) for 40 Hz spectral power obtained from reconstructed source  
611 (Empirical) and output of neural dynamics model simulation (Theoretical), C.) Variation of LI  
612 under parametric variation of global coupling( $k$ ) and mean delay ( $\tau$ ) in the large-scale neural  
613 model.

614

615 **Table 1:** t-statistic and *p* values of significant 40 Hz ASSRs clusters over scalp.

616

617 **Table 2:** List of 40 Hz ASSRs source labels with number of voxel activated in left and right

618 hemisphere.

Figure 1

(A)

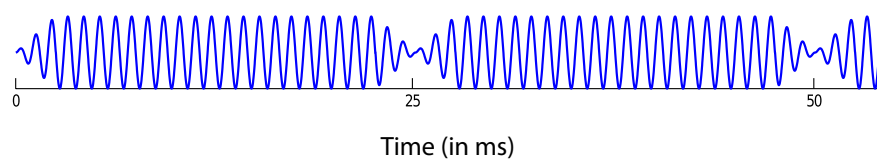

(B)

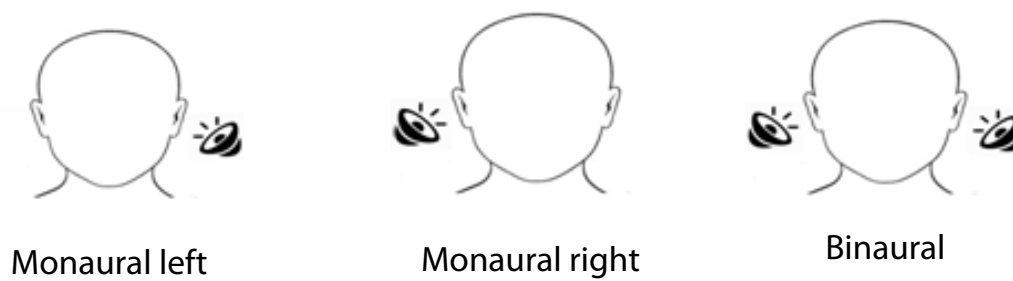

Figure 2

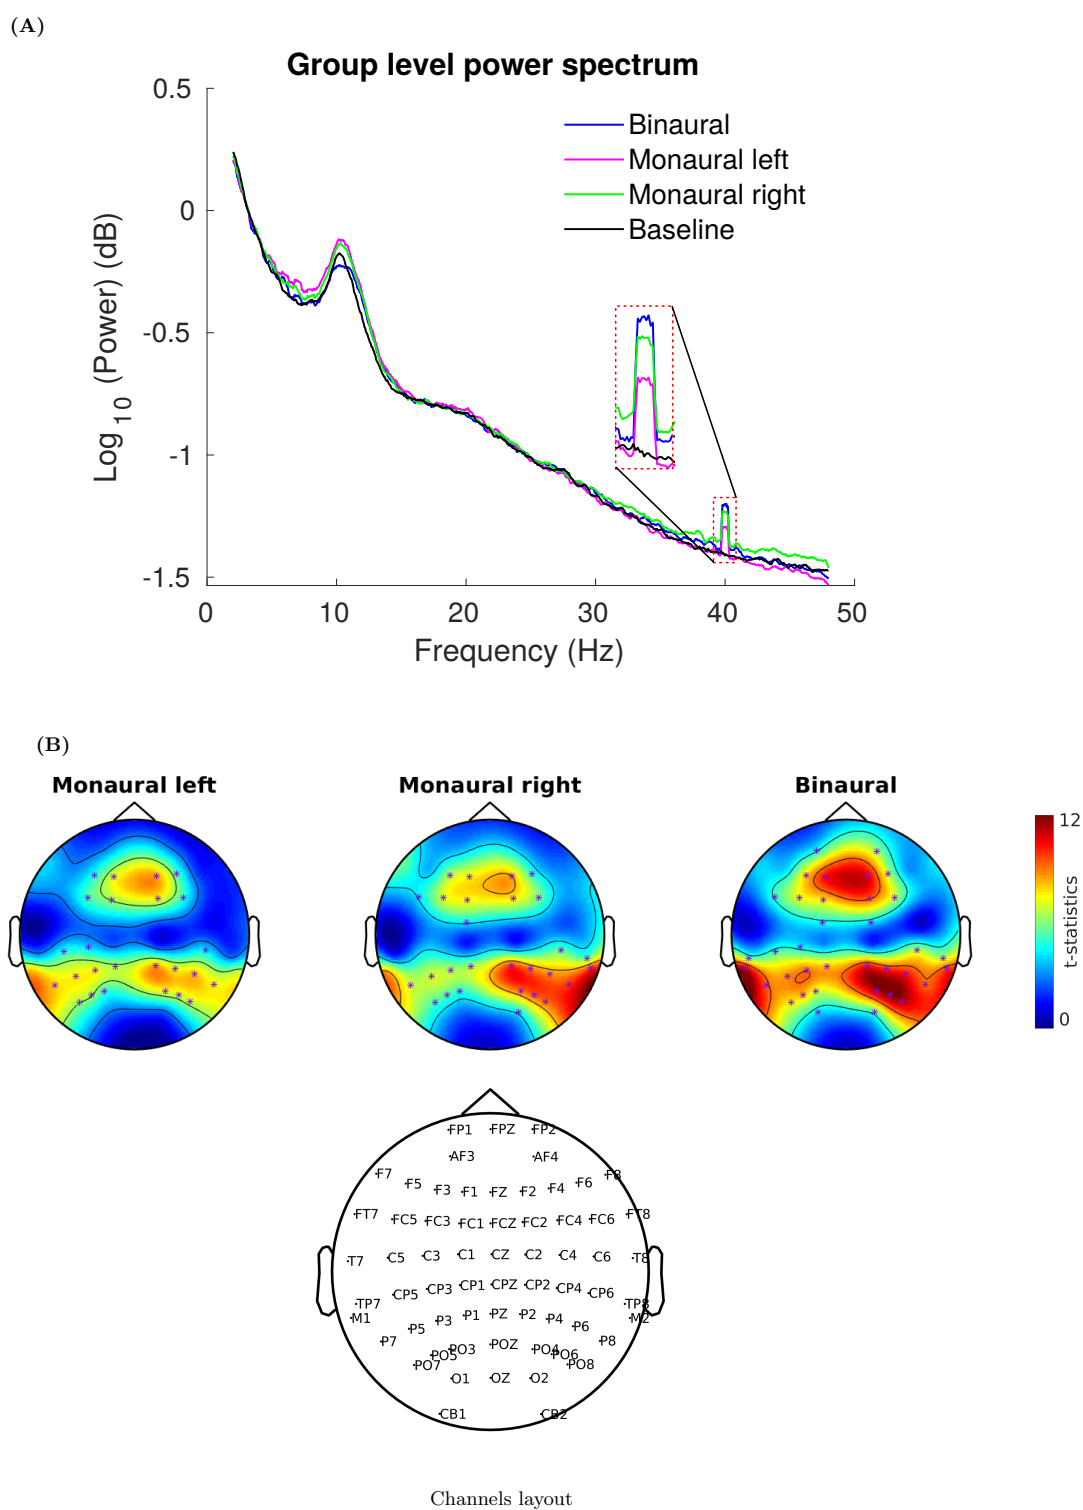



Figure 3

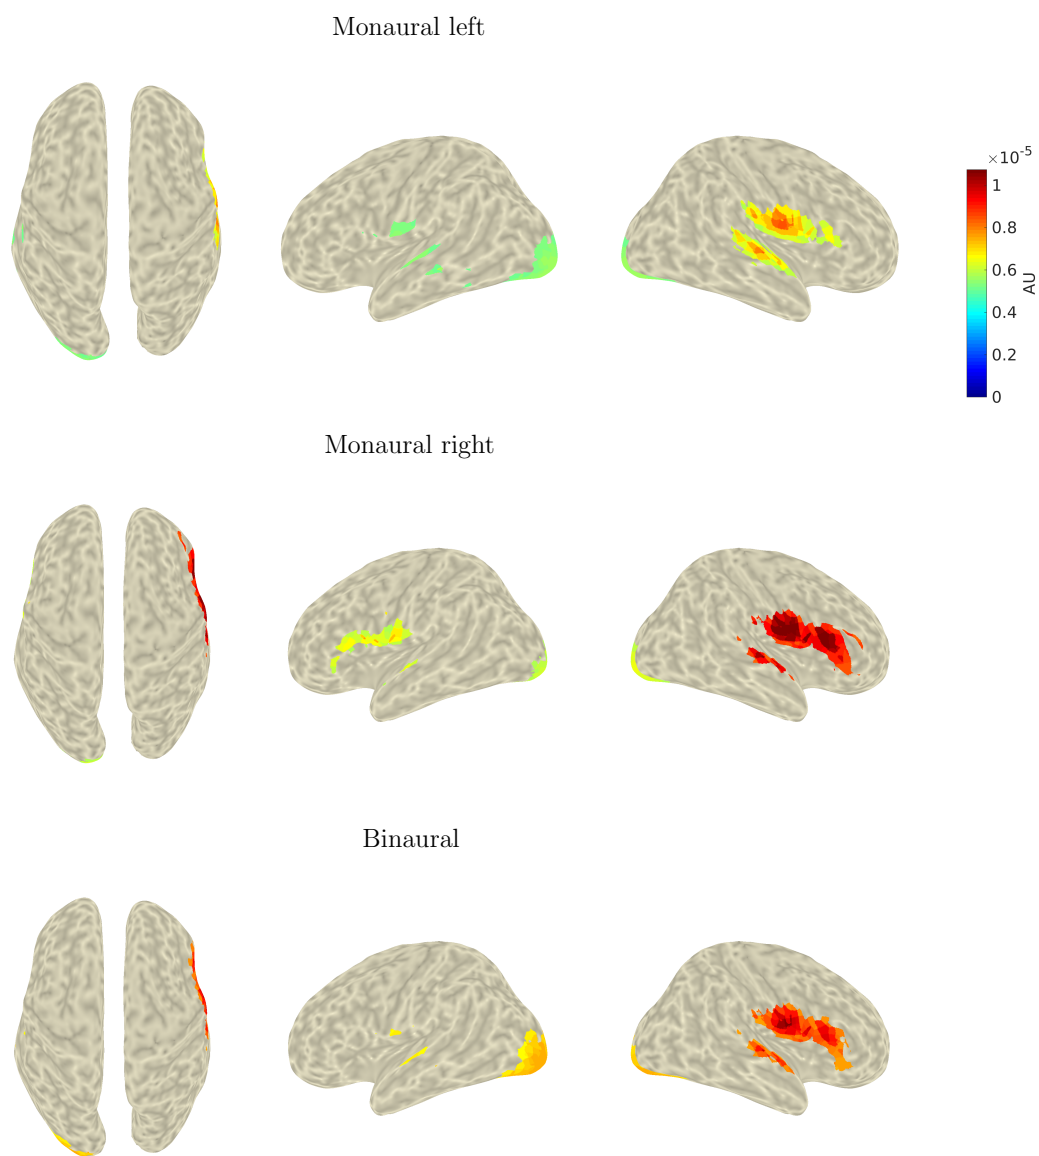

Figure 4

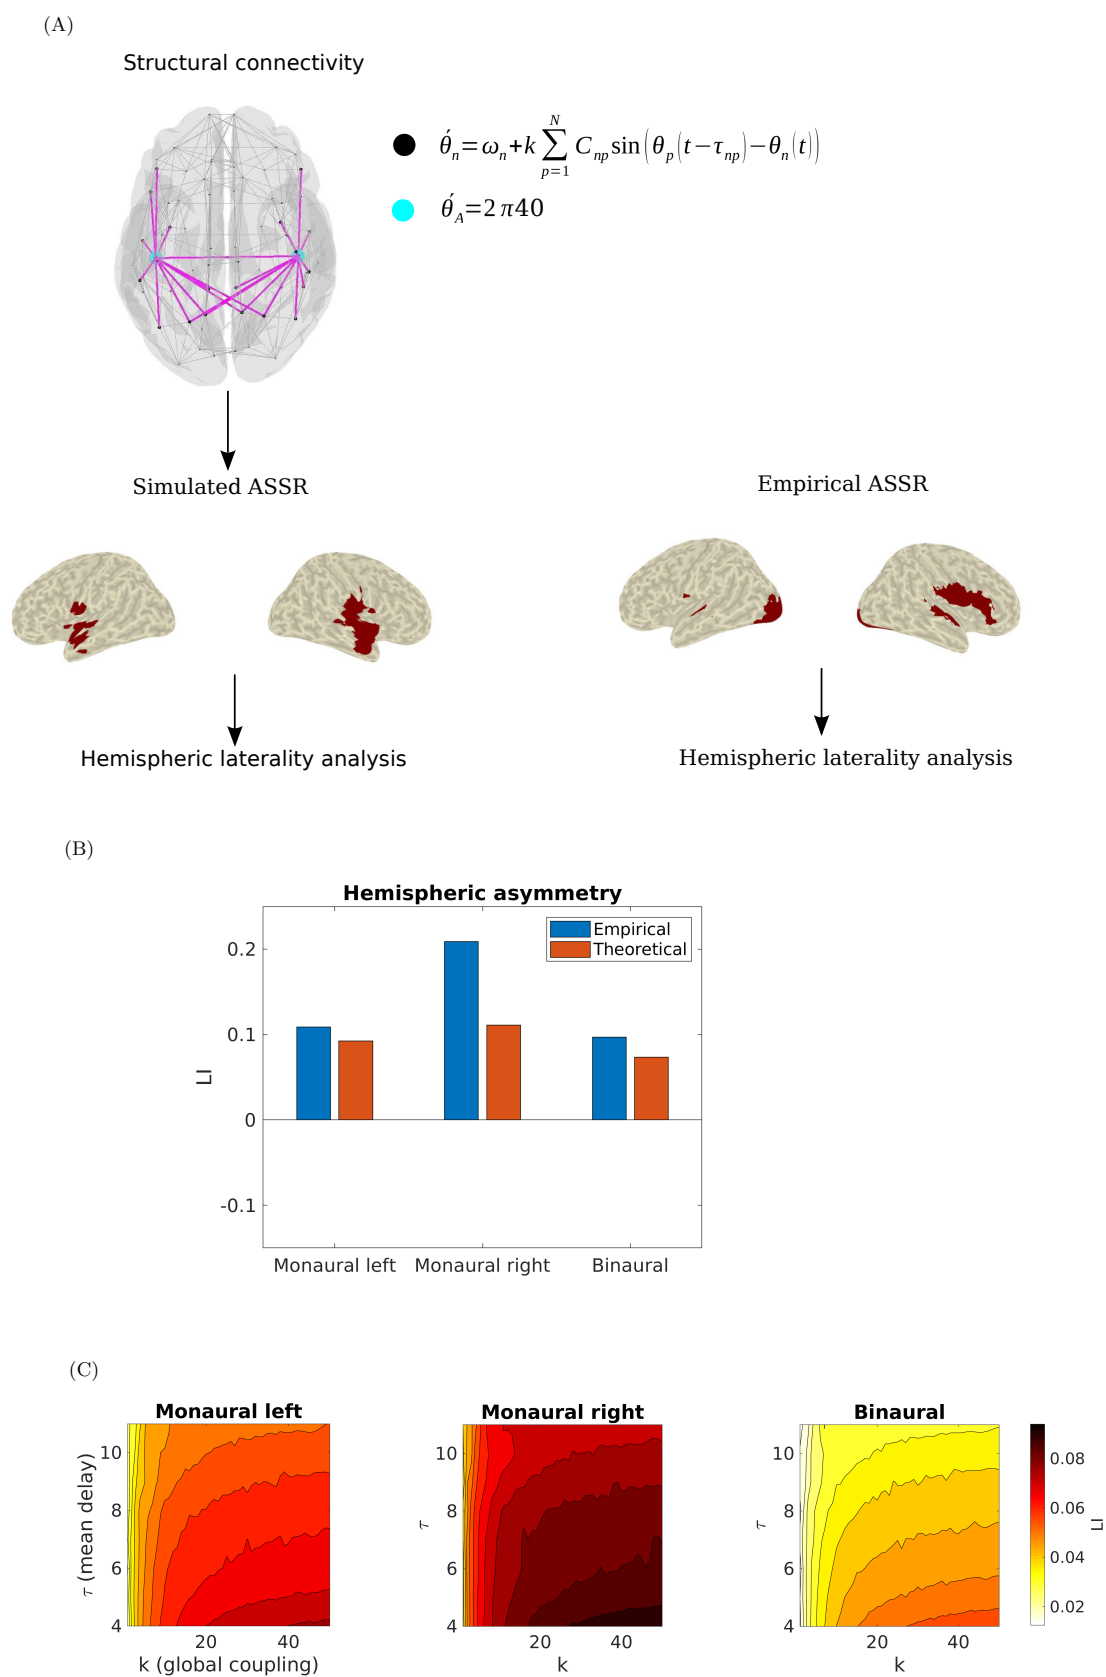

Table 1

|                  | <b><u>Monaural left</u></b> |                 | <b><u>Monaural right</u></b> |                 | <b><u>Binaural</u></b>  |                 |
|------------------|-----------------------------|-----------------|------------------------------|-----------------|-------------------------|-----------------|
|                  | t-score ( $t_{(185)}$ )     | <i>p</i> -value | t-score ( $t_{(185)}$ )      | <i>p</i> -value | t-score ( $t_{(185)}$ ) | <i>p</i> -value |
| Fronto-central   | 119.67                      | < 0.001         | 146.64                       | < 0.001         | 214.80                  | < 0.001         |
| Posterior region | 69.45                       | < 0.001         | 83.94                        | < 0.001         | 116.90                  | < 0.001         |

Table 2

| Monaural left          |               |                        |               |
|------------------------|---------------|------------------------|---------------|
| Left hemisphere        | No. of voxels | Right hemisphere       | No. of voxels |
| Superior temporal      | 9             | Superior temporal      | 24            |
| Postcentral            | 3             | Postcentral            | 14            |
| Precentral             | 4             | Precentral             | 12            |
| Supramarginal          | 1             | Supramarginal          | 10            |
| Middle temporal lobe   | 3             | Middle temporal lobe   | 1             |
| Lateral occipital lobe | 32            | Pars Triangularis      | 2             |
| Lingual                | 7             | Pars Percularis        | 8             |
| Fusiform               | 5             | Transverse temporal    | 2             |
| Pericalcarine          | 3             |                        |               |
| Inferior temporal lobe | 1             |                        |               |
| Monaural right         |               |                        |               |
| Precentral             | 13            | Precentral             | 15            |
| Pars Percularis        | 9             | Pars Percularis        | 13            |
| Pars Triangularis      | 5             | Pars Triangularis      | 13            |
| Postcentral            | 4             | Postcentral            | 13            |
| Superior temporal      | 6             | Superior temporal      | 12            |
| Lateral occipital lobe | 19            | Rostral middle frontal | 3             |
| Lingual                | 7             | Pars Orbitalis         | 2             |
| Cuneus                 | 2             | Supramarginal          | 2             |
| Pericalcarine          | 2             |                        |               |
| Fusiform               | 1             |                        |               |
| Binaural               |               |                        |               |
| Superior temporal      | 5             | Superior temporal      | 17            |
| Precentral             | 1             | Precentral             | 15            |
| Postcentral            | 1             | Postcentral            | 13            |
| Lateral occipital lobe | 35            | Pars Percularis        | 13            |
| Lingual                | 14            | Pars Triangularis      | 10            |
| Fusiform               | 7             | Supramarginal          | 3             |
| Pericalcarine          | 4             | Pars Orbitalis         | 2             |
| Middle temporal lobe   | 1             |                        |               |
